# Supplementary material
Source: PubMed Central journal article supplement (PMC5033878)
Supplement: jciinsight-1-85922-s001.pdf [file jciinsight-1-85922-s001.pdf]

**Supplemental Data**

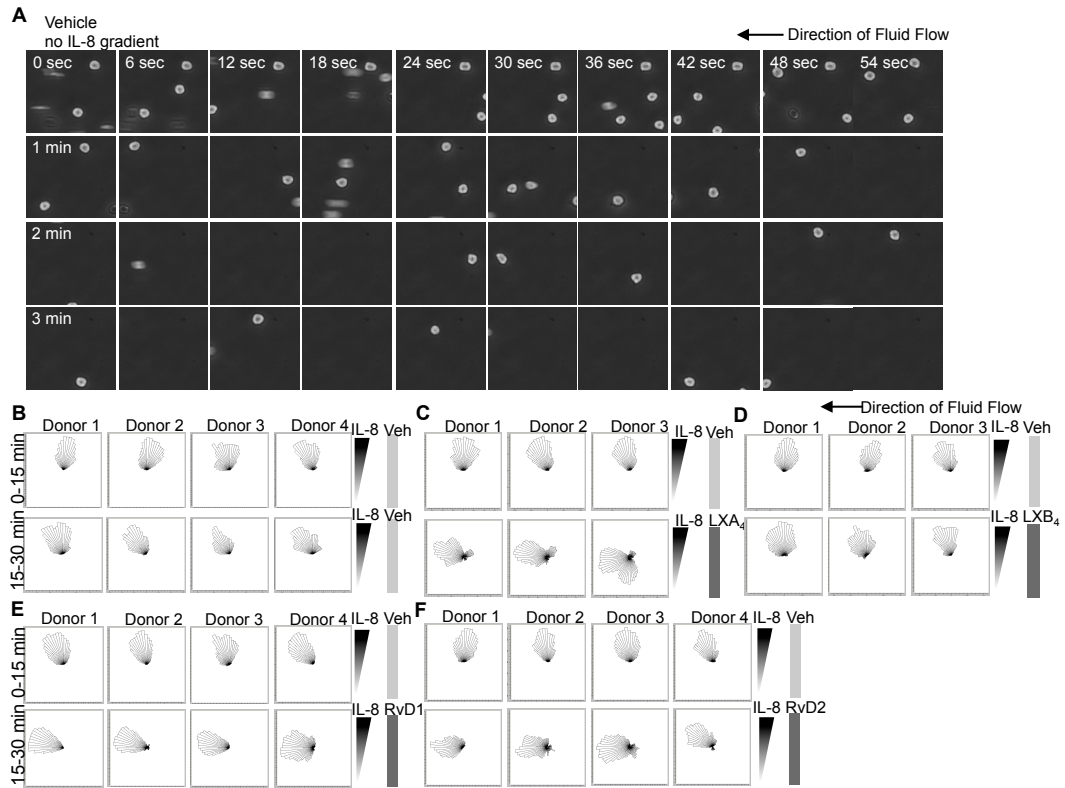

**Supplemental Figure 1. Neutrophil migration trajectories following exposure to Specialised pro-resolving lipid mediators (SPM).** Neutrophils were captured from whole blood of healthy volunteers on P-selectin and ICAM-1-coated microfluidics chambers. (A) Neutrophils remained rounded and rapidly detached in the absence of a chemotactic gradient. Cells were exposed to media plus vehicle (0.1% ethanol) and videos were captured in real-time over 15 min. Representative still images are shown for the first 4 min, taken every 6 sec. (B) Rose plots indicating migration trajectories from individual donors after exposure to an IL-8 gradient (10nM, 15min) followed by exposure to a set concentration of resolvin D1 (RvD1), RvD2, lipoxin A<sub>4</sub> (LXA<sub>4</sub>) or LXB<sub>4</sub> (1nM, 15min) or vehicle together with the IL-8 gradient.

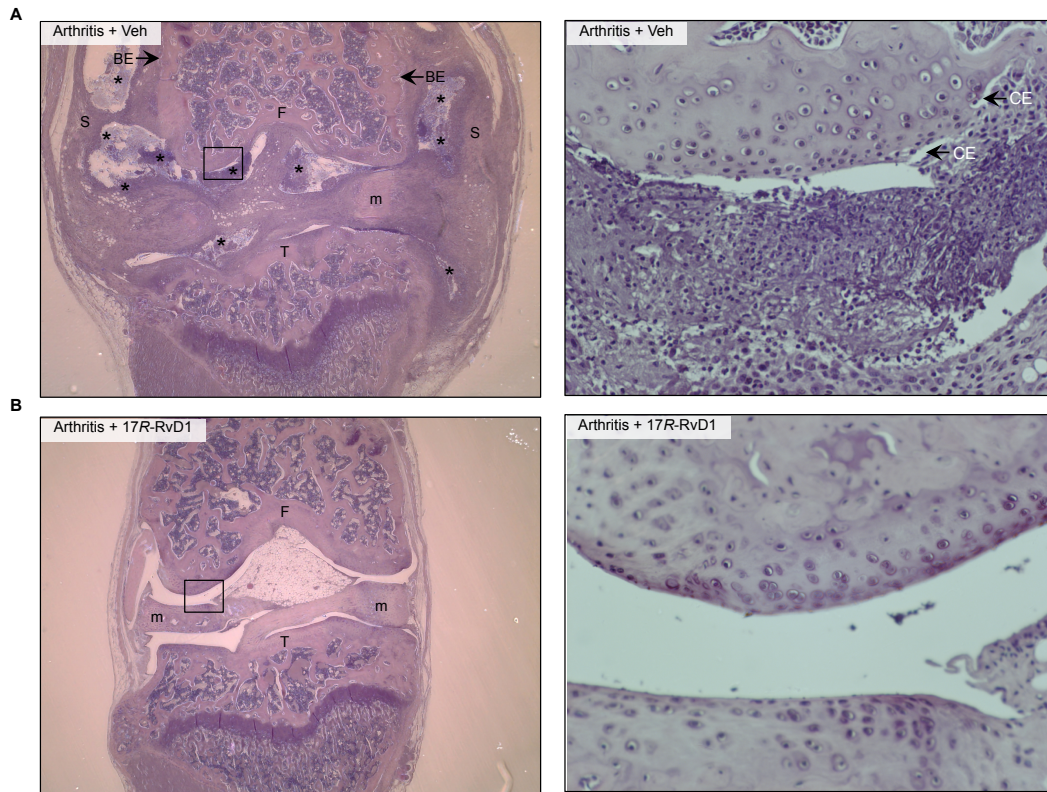

**Supplemental Figure 2. Histopathology of murine knee joints is improved with 17R-RvD1 treatment.** (A) Representative haematoxylin & eosin histology sections of knee joints from arthritic mice 8 days after arthritis induction following daily administration of vehicle (0.1% ethanol in PBS, i.p.) or (B) 17R-RvD1 (100ng, i.p.). Representative low (x4) and high (x20) power magnifications are shown for each genotype. F; femur, T; tibia, m; meniscus, PF; pannus formation, BE; bone erosion, S; synovitis, \*; neutrophil infiltration, from  $n=5-7$  mice per group.

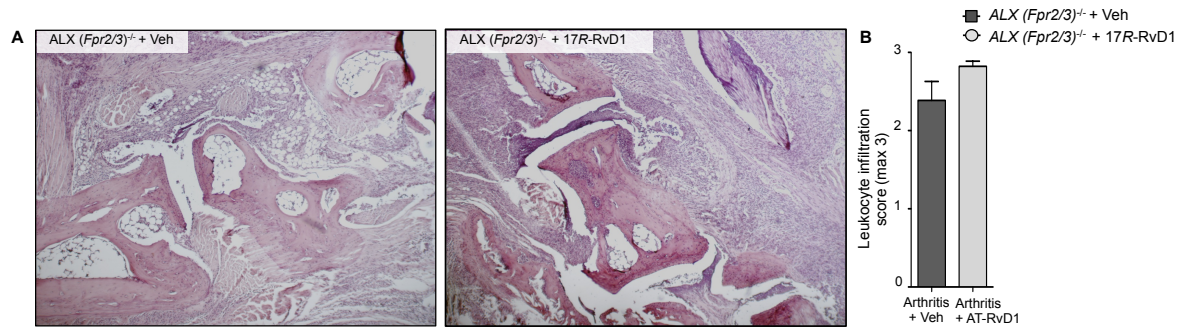

**Supplemental Figure 3. Joint protection from 17R-RvD1 is lost in *Fpr2/3* (ALX) null mice.** (A) Representative haematoxylin & eosin histology sections of murine arthritic hind paws 8 days after arthritis induction (x10 magnification). (B) Histological score calculated by degree of leukocyte infiltration (max. 3),  $n=5-6$  mice per group.

| Relative Expression (AU) |               |                         |          |
|--------------------------|---------------|-------------------------|----------|
| Gene                     | Arthritis     | Arthritis<br>+ 17R-RvD1 | % Change |
| <i>Alox15</i>            | 1.76 ± 0.73   | 3.74 ± 1.12             | + 112.5  |
| <i>Il-1β</i>             | 22.56 ± 9.96  | 10.57 ± 2.58            | - 53.2   |
| <i>Ly6g</i>              | 4.85 ± 2.66   | 1.31 ± 0.35             | - 73.0   |
| <i>Ptsg2</i>             | 21.05 ± 10.78 | 6.35 ± 2.06             | - 69.9   |

**Supplemental Table 1. Comparative relative expression of inflammatory genes in murine arthritic joint tissue.** Arthritic mouse paws were collected for gene analysis on day 8 (see methods for details). Relative expression values were calculated following normalization to endogenous housekeeping gene *Rpl32* and using the  $2^{-(\Delta\Delta Ct)}$  method normalized to a naïve mouse (calibrator sample).
